# Supplementary material for: Improving the long-lead predictability of El Niño using a novel forecasting scheme based on a dynamic components model
Source: Springer Nature journal article supplement (doi:10.1007/s00382-016-3139-y), 2016-05-02
Supplement: MOESM1 [file 382_2016_3139_MOESM1_ESM.pdf]

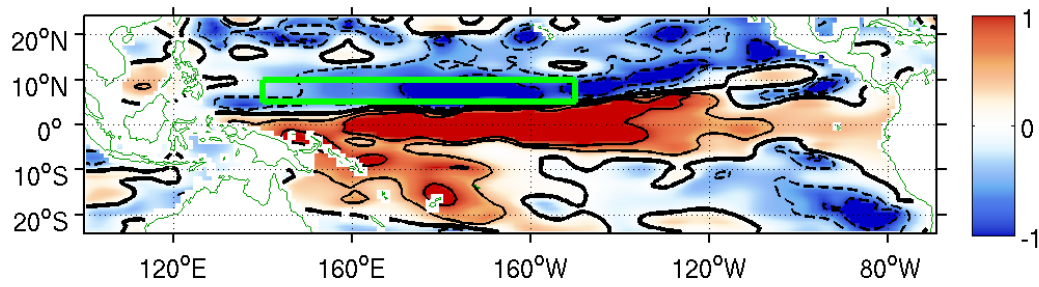

**Fig. S1** Normalized temperature ( $^{\circ}\text{C}$ , shading, contours) anomaly composites with respect to El Niño events at 100 metres depth and 6 months lead/lag time. The contour interval is  $0.5^{\circ}\text{C}$ , with solid (dashed) lines depicting positive (negative) anomalies. The events used for the calculation of the composites are as in Figures 7 and 8. The green rectangle indicates the Region "cold" ( $[140e - 210e] \times [5n - 10n]$ , Table 2).

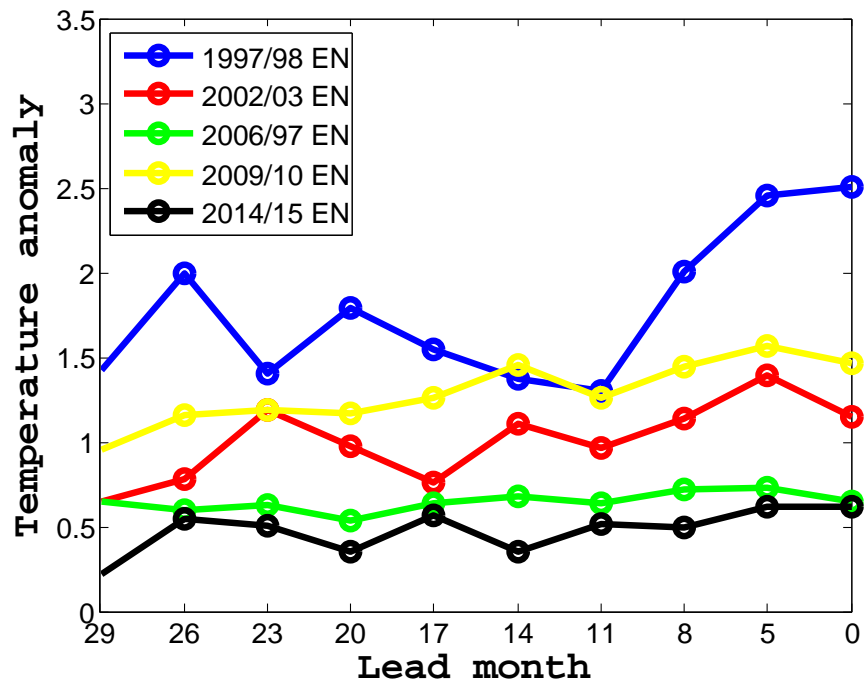

**Fig. S2** Predictions of the January target month for all EN events shown in Figure 9: 1997/98 (blue), 2002/03 (red), 2006/07 (green), 2009/10 (yellow), 2014/15 (black). The lead months for the respective events are as in Table 9, and lead month 0 corresponds to the observations.

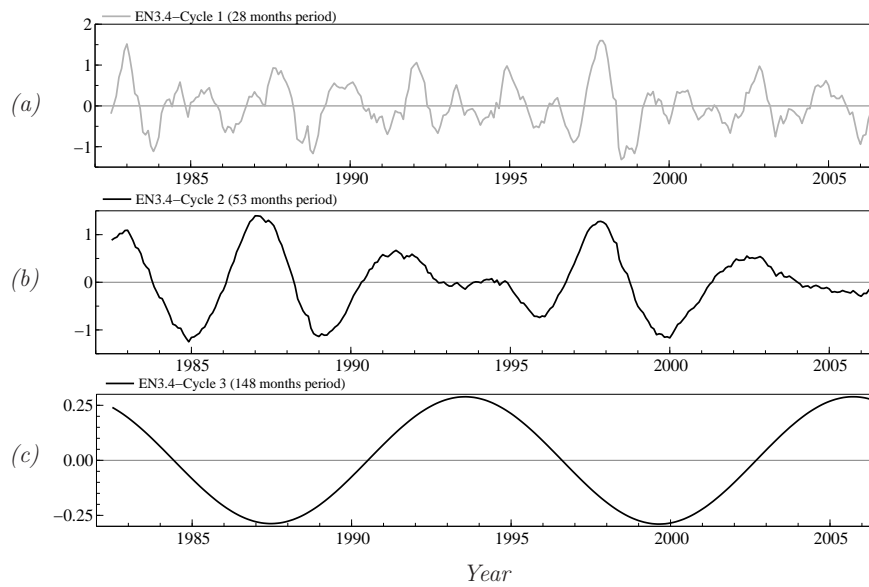

**Fig. S3** Cycle components graphics of the model used to predict the 2006/07 EN event. The estimated cycle periods are approximately (a) 2.5, (b) 4.5, (c) 12 years.

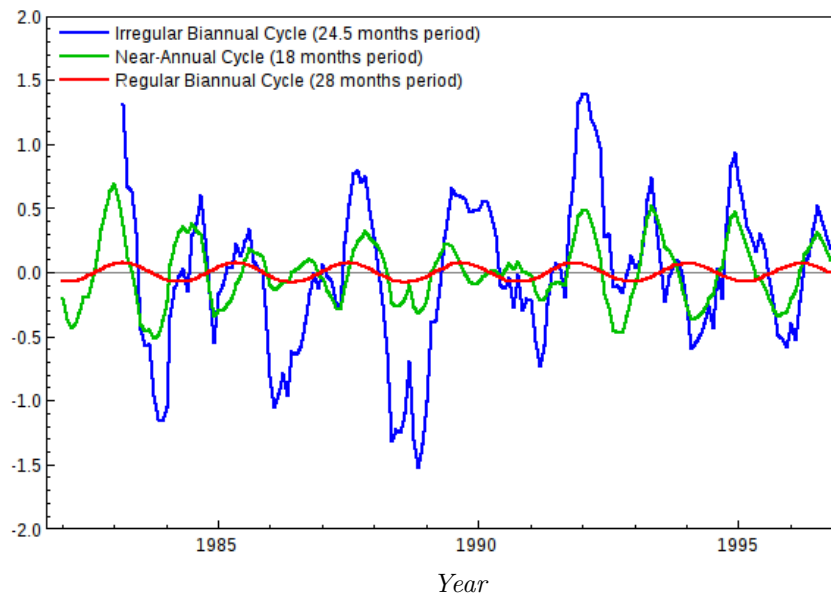

**Fig. S4** Superposition of Cycle 1 (1.5 years period) from Figure 1(c) (green), Cycle 2 (2.5 years period) from Figure 1(d) (red), and Cycle 1 (2.5 years period) from Supplementary Figure 3(a) (blue).

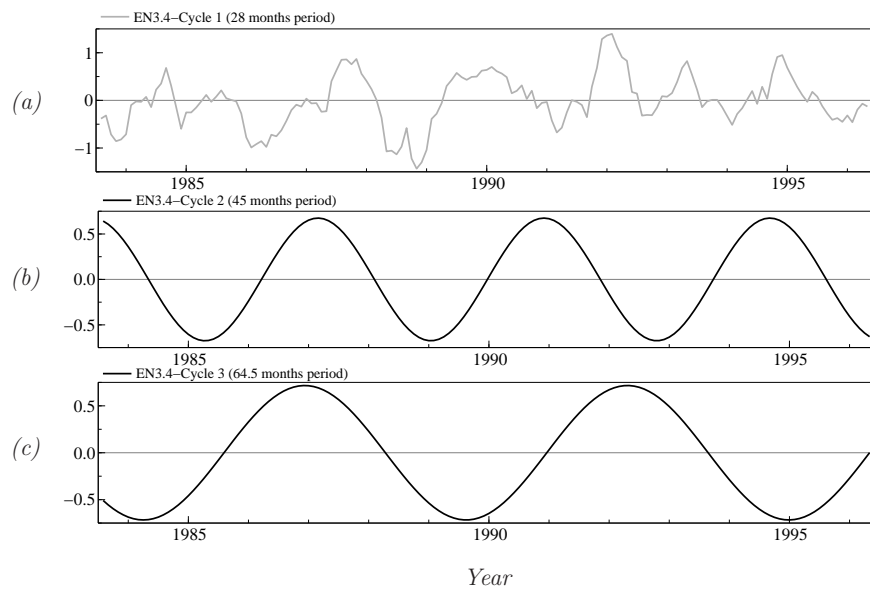

**Fig. S5** Same as Supplementary Figure 3, but for the 1997/98 EN event. The estimated cycle periods are approximately (a) 2.5, (b) 3.7, (c) 5.4 years.
